# Supplementary material for: COVID-19 virtual patient cohort suggests immune mechanisms driving disease outcomes
Source: PubMed Central journal article supplement (PMC8312984; doi:10.1371/journal.ppat.1009753), 2021-07-14
Supplement: ppat.1009753.s014.pdf [file ppat.1009753.s014.pdf]

a) Viral kinetic parameters

| Param             | Units                                                           | Description                              | Value          | Estimation and citation       |
|-------------------|-----------------------------------------------------------------|------------------------------------------|----------------|-------------------------------|
| $p$               | 1/day<br>$\times \log(\text{cop/ml})$<br>/10 <sup>9</sup> cells | Lytic viral production rate              | 2.59           | Direct estimate <sup>1</sup>  |
| $\lambda_S$       | 1/day                                                           | Proliferation of epithelial cells        | 0.74           | Fit S2 Fig, data <sup>2</sup> |
| $S_{max}$         | 10 <sup>9</sup> cells                                           | Epithelial cells carrying capacity       | $S_0$          | Direct estimate <sup>3</sup>  |
| $\lambda_{M\Phi}$ | $\log(\text{cop/ml})/\text{day}$                                | Production of alveolar macrophages       | 5943           | Fit S3 Fig, data <sup>4</sup> |
| $M_{\Phi max}$    | 10 <sup>9</sup> cells/ml                                        | Alveolar macrophage carrying capacity    | $M_{\Phi R,0}$ | Fit S3 Fig                    |
| $\beta$           | 1/day $\times$ 1/<br>$\log(\text{cop/ml})$                      | SARS-CoV-2 virus infection rate          | 0.29           | Fit Fig 2, data <sup>1</sup>  |
| $\tau_I$          | day                                                             | Eclipse time                             | 0.17           | Direct estimate <sup>5</sup>  |
| $d_I$             | 1/day                                                           | Death rate of infected cells             | 0.1            | Fit Fig 2, data <sup>1</sup>  |
| $\tau_T$          | 1/day                                                           | Delay in CD8 <sup>+</sup> T cell arrival | 4.5            | Direct estimate <sup>6</sup>  |

b) Cell production, recruitment, and activation rates

| Param           | Units                                          | Description                                       | Value                | Estimation and citation        |
|-----------------|------------------------------------------------|---------------------------------------------------|----------------------|--------------------------------|
| $p_{M\Phi I,G}$ | 1/day                                          | Monocyte to macrophage differentiation by GM-CSF  | 1.7                  | Direct estimate <sup>7</sup>   |
| $p_{M\Phi I,L}$ | 1/day                                          | Monocyte to macrophage differentiation by IL-6    | 1.7                  | Direct estimate <sup>7</sup>   |
| $a_{I,M\Phi}$   | ml/(10 <sup>9</sup> cells) $\times$<br>(1/day) | Activation of macs by infected and dead cells     | $1.1 \times 10^3$    | Direct estimate <sup>8,9</sup> |
| $p_{M,I}$       | 1/day                                          | Monocyte recruitment rate by infected cells       | 0.22                 | Direct estimate <sup>10</sup>  |
| $p_{T,F}$       | 1/day                                          | CD8 <sup>+</sup> T cell production rate by IFN    | 4                    | Direct estimate <sup>11</sup>  |
| $p_{N,L}$       | 1/day                                          | Neutrophils recruitment rate by IL-6              | 0.21                 | Homeostasis                    |
| $p_{T,L}$       | 1/day                                          | CD8 <sup>+</sup> T cells recruitment rate by IL-6 | 4                    | Direct estimate <sup>11</sup>  |
| $p_{T,I}$       | 1/day                                          | CD8 <sup>+</sup> T cell proliferation rate        | 1                    | Direct estimate <sup>12</sup>  |
| $M_{prod}^*$    | 1/day                                          | Homeostasis reservoir release rate                | 0.13                 | Homeostasis                    |
| $\psi_M^{max}$  | 1/day                                          | Maximal reservoir release rate                    | 11.55                | Direct estimate <sup>13</sup>  |
| $N_{prod}^*$    | 1/day                                          | Homeostasis reservoir release rate                | 0.21                 | Homeostasis                    |
| $\psi_N^{max}$  | 1/day                                          | Maximal reservoir release rate                    | 4.13                 | Direct estimate <sup>14</sup>  |
| $C_{BF}^*$      | Dimensionless                                  | Homeostasis neutrophil receptor bound fraction    | $1.6 \times 10^{-5}$ | Direct estimate <sup>14</sup>  |

c) Cell-related half-effect ( $\epsilon$ ), IC50 ( $IC_{50}$ ), and Hill coefficient ( $h$ ) parameters

| Param                  | Units | Description                                | Value                | Estimation and citation        |
|------------------------|-------|--------------------------------------------|----------------------|--------------------------------|
| $\epsilon_{F,I}$       | pg/ml | IFN inhibition of viral production         | $4.7 \times 10^{-4}$ | Direct estimate <sup>15</sup>  |
| $\epsilon_{L,M\Phi}$   | pg/ml | IL-6 monocytes to macrophages              | 0.011                | Fit S1 Fig, data <sup>16</sup> |
| $\epsilon_{G,M\Phi I}$ | pg/ml | GM-CSF monocyte to macrophages             | 0.027                | Fit S1 Fig, data <sup>17</sup> |
| $\epsilon_{G,M}$       | pg/ml | GM-CSF recruitment of monocytes            | 57.2                 | Fit S1 Fig, data <sup>18</sup> |
| $\epsilon_{F,T}$       | pg/ml | IFN production of CD8 <sup>+</sup> T cells | 0.004                | Fit S1 Fig, data <sup>19</sup> |

|                      |                 |                                             |                       |                                |
|----------------------|-----------------|---------------------------------------------|-----------------------|--------------------------------|
| $\epsilon_{C,N}$     | unitless        | G-CSF recruitment of neutrophils            | $1.89 \times 10^{-4}$ | Fit S1 Fig, data <sup>14</sup> |
| $\epsilon_{L,N}$     | pg/ml           | IL-6 recruitment of neutrophils             | 57.2                  | Estimated: $\epsilon_{G,M}$    |
| $\epsilon_{I,M}$     | $10^9$ cells/ml | Infected cell monocyte recruitment          | 0.11                  | Estimated                      |
| $\epsilon_{L,T}$     | pg/ml           | IL-6 production of CD8 <sup>+</sup> T cells | $3 \times 10^{-4}$    | Fit S1 Fig, data <sup>20</sup> |
| $\epsilon_{V,M\Phi}$ | log(cop/ml)     | Viral load for mac replenishing             | 2.96                  | Fit S3 Fig                     |
| $\epsilon_{T,I}$     | $10^9$ cells/ml | Antigen driven proliferation                | $10^{-6}$             | Direct estimate <sup>12</sup>  |
| $h_M$                | Dimensionless   | GM-CSF monocyte recruitment                 | 1.67                  | Fit S1 Fig, data <sup>18</sup> |
| $h_{M,M\Phi}$        | Dimensionless   | GM-CSF monocyte to macrophages              | 2.03                  | Fit S1 Fig, data <sup>17</sup> |
| $h_N$                | Dimensionless   | Neutrophil induced damage                   | 3.02                  | Fit S1 Fig, data <sup>21</sup> |
| $IC_{50,N}$          | $10^9$ cells/ml | Neutrophil induced damage                   | 0.047                 | Fit S1 Fig, data <sup>21</sup> |

d) Cell/virus-induced death rates

| Param              | Units                        | Description                                                      | Value | Estimation and citation          |
|--------------------|------------------------------|------------------------------------------------------------------|-------|----------------------------------|
| $\delta_{V,M\Phi}$ | ml/( $10^9$ cells) × 1/day   | Rate of viral clearance by macrophages                           | 768   | Fit S2 Fig, data <sup>22</sup>   |
| $\delta_{V,N}$     | ml/( $10^9$ cells) × 1/day   | Rate of viral clearance by neutrophils                           | 2304  | Estimated                        |
| $\delta_N$         | 1/day                        | Rate of neutrophil inflicted damage                              | 1.68  | Fit S2 Fig, data <sup>23</sup>   |
| $\rho$             | Dimensionless                | Bystander death modulation constant                              | 0.5   | Estimated                        |
| $\delta_{I,M\Phi}$ | ml/( $10^9$ cells) × (1/day) | Rate macrophages phagocytose infected cells                      | 121   | Direct estimate <sup>24</sup>    |
| $\delta_{I,T}$     | ml/( $10^9$ cells) × (1/day) | Rate CD8 <sup>+</sup> T cells induce apoptosis in infected cells | 238   | Direct estimate <sup>25</sup>    |
| $\delta_{M\Phi,D}$ | ml/( $10^9$ cells) × (1/day) | Rate macrophages die from phagocytosis                           | 6.06  | Direct estimate <sup>26,27</sup> |
| $\delta_{D,M\Phi}$ | ml/( $10^9$ cells) × (1/day) | Rate macrophages phagocytose dead cells                          | 8.03  | Fit S2 Fig, data <sup>26</sup>   |

e) Cell death and virus decay rates

| Param         | Units | Description                         | Value | Estimation and citation       |
|---------------|-------|-------------------------------------|-------|-------------------------------|
| $d_V$         | 1/day | Viral decay rate                    | 1.81  | Fit Fig 2, data <sup>28</sup> |
| $d_D$         | 1/day | Degradation rate of apoptosed cells | 8     | Direct estimate <sup>29</sup> |
| $d_{M\Phi R}$ | 1/day | Alveolar macrophage death rate      | 0     | Direct estimate <sup>30</sup> |
| $d_{M\Phi I}$ | 1/day | Inflammatory macrophage death rate  | 0.3   | Direct estimate <sup>31</sup> |
| $d_M$         | 1/day | Monocyte death rate                 | 0.76  | Direct estimate <sup>32</sup> |
| $d_N$         | 1/day | Neutrophil death rate               | 1.28  | Direct estimate <sup>33</sup> |
| $d_T$         | 1/day | CD8 <sup>+</sup> T cell death rate  | 0.4   | Direct estimate <sup>34</sup> |

f) Cytokine production rates

| Param           | Units     | Description                                 | Value | Estimation and citation        |
|-----------------|-----------|---------------------------------------------|-------|--------------------------------|
| $p_{L,I}$       | pg/ml/day | IL-6 production by infected cells           | 11.89 | Fit S4 Fig, data <sup>35</sup> |
| $p_{L,M\Phi I}$ | pg/ml/day | IL-6 production by inflammatory macrophages | 1872  | Fit S5 Fig, data <sup>36</sup> |
| $p_{L,M}$       | pg/ml/day | IL-6 production by monocytes                | 72.56 | Fit S1 Fig, data <sup>37</sup> |

|                 |           |                                               |       |                                   |
|-----------------|-----------|-----------------------------------------------|-------|-----------------------------------|
| $p_{G,M\Phi I}$ | pg/ml/day | GM-CSF production by inflammatory macrophages | 2626  | Direct estimate <sup>38</sup>     |
| $p_{C,M}$       | ng/ml/day | G-CSF production by monocytes                 | 26.26 | Estimated: $p_{G,M\Phi I}$        |
| $p_{G,M}$       | pg/ml/day | GM-CSF production by monocytes cells          | 3070  | Fit S3 Fig, data <sup>39</sup>    |
| $p_{F,I}$       | pg/ml/day | IFN production by infected cells              | 2.82  | Fit S3 Fig, data <sup>40</sup>    |
| $p_{F,M\Phi I}$ | pg/ml/day | IFN production by inflammatory macrophages    | 1.3   | Estimated                         |
| $p_{F,M}$       | pg/ml/day | IFN production by monocytes                   | 3.56  | Fit S3 Fig, data <sup>41,42</sup> |

*g) Cytokine production half-effect ( $\eta$ ) and Hill coefficient ( $h$ ) parameters*

| Param              | Units           | Description                       | Value                | Estimation and citation           |
|--------------------|-----------------|-----------------------------------|----------------------|-----------------------------------|
| $\eta_{L,I}$       | $10^9$ cells/ml | IL-6 production by infected cells | 0.7                  | Fit S4 Fig, data <sup>35</sup>    |
| $\eta_{L,M}$       | $10^9$ cells/ml | IL-6 by monocytes                 | 0.0045               | Fit S1 Fig, data <sup>37</sup>    |
| $\eta_{L,M\Phi I}$ | $10^9$ cells/ml | IL-6 by inflammatory macrophages  | $3.6 \times 10^{-5}$ | Fit S4 Fig, data <sup>36</sup>    |
| $\eta_{G,M\Phi}$   | $10^9$ cells/ml | GM-CSF by macrophages             | $3.6 \times 10^{-5}$ | Estimated: $\eta_{L,M\Phi}$       |
| $\eta_{G,M}$       | $10^9$ cells/ml | GM-CSF by monocytes               | 0.15                 | Homeostasis                       |
| $\eta_{C,M}$       | $10^9$ cells/ml | G-CSF by monocytes                | 3.05                 | Homeostasis                       |
| $\eta_{F,I}$       | $10^9$ cells/ml | IFN by infected cells             | 0.011                | Fit S4 Fig, data <sup>40</sup>    |
| $\eta_{F,M\Phi I}$ | $10^9$ cells/ml | IFN by inflammatory macrophages   | $1.3 \times 10^{-6}$ | Homeostasis                       |
| $\eta_{F,M}$       | $10^9$ cells/ml | IFN by monocytes                  | 0.54                 | Fit S3 Fig, data <sup>41,42</sup> |

*h) Cytokine linear (renal) clearance and internalization rates*

| Param      | Units | Description                    | Value | Estimation and citation        |
|------------|-------|--------------------------------|-------|--------------------------------|
| $k_{linL}$ | 1/day | Rate of IL-6 renal clearance   | 16.6  | Direct estimate <sup>43</sup>  |
| $k_{linG}$ | 1/day | Rate of GM-CSF renal clearance | 11.7  | Direct estimate <sup>44</sup>  |
| $k_{linC}$ | 1/day | Rate of G-CSF renal clearance  | 0.16  | Direct estimate <sup>14</sup>  |
| $k_{linF}$ | 1/day | Rate of IFN renal clearance    | 18    | Direct estimate <sup>45</sup>  |
| $k_{intL}$ | 1/day | Internalization rate of IL-6   | 61.8  | Fit S2 Fig, data <sup>46</sup> |
| $k_{intG}$ | 1/day | Internalization rate of GM-CSF | 73.4  | Direct estimate <sup>47</sup>  |
| $k_{intC}$ | 1/day | Internalization rate of G-CSF  | 462   | Direct estimate <sup>14</sup>  |
| $k_{intF}$ | 1/day | Internalization rate of IFN    | 17    | Direct estimate <sup>48</sup>  |

*i) Cytokine binding/unbinding rates and stoichiometric constant*

| Param    | Units     | Description           | Value  | Estimation and citation       |
|----------|-----------|-----------------------|--------|-------------------------------|
| $k_{BL}$ | ml/pg/day | IL-6 binding rate     | 0.0018 | Direct estimate <sup>49</sup> |
| $k_{BG}$ | ml/pg/day | GM-CSF binding rate   | 0.0021 | Direct estimate <sup>47</sup> |
| $k_{BC}$ | ml/ng/day | G-CSF binding rate    | 2.24   | Direct estimate <sup>14</sup> |
| $k_{BF}$ | ml/pg/day | IFN binding rate      | 0.011  | Direct estimate <sup>48</sup> |
| $k_{UL}$ | 1/day     | IL-6 unbinding rate   | 22.3   | Direct estimate <sup>49</sup> |
| $k_{UG}$ | 1/day     | GM-CSF unbinding rate | 522    | Direct estimate <sup>47</sup> |
| $k_{UC}$ | 1/day     | G-CSF unbinding rate  | 184    | Direct estimate <sup>14</sup> |

|           |               |                                                     |        |                               |
|-----------|---------------|-----------------------------------------------------|--------|-------------------------------|
| $k_{UF}$  | 1/day         | IFN unbinding rate                                  | 6.07   | Direct estimate <sup>48</sup> |
| $POW$     | Dimensionless | Stoichiometric constant (G-CSF)                     | 1.4608 | Direct estimate <sup>14</sup> |
| $\hat{p}$ | Dimensionless | Stoichiometric constant (IL-6, GM-CSF, IFN)         | 1      | Direct estimate <sup>14</sup> |
|           |               | Stoichiometry relating constant (G-CSF)             | 2      |                               |
|           |               | Stoichiometry relating constant (IL-6, GM-CSF, IFN) | 1      |                               |

*j) Number of cellular receptors and cytokine molecular weights*

| Param     | Units      | Description                            | Value | Estimation and citation       |
|-----------|------------|----------------------------------------|-------|-------------------------------|
| $K_{L,N}$ | sites/cell | No. IL-6 receptors on neutrophils      | 720   | Direct estimate <sup>50</sup> |
| $K_{L,T}$ | sites/cell | No. IL-6 receptors on T cells          | 300   | Direct estimate <sup>51</sup> |
| $K_{L,M}$ | sites/cell | No. of IL-6 receptors on monocytes     | 509   | Direct estimate <sup>52</sup> |
| $K_{G,M}$ | sites/cell | No. GM-CSF receptors on monocyte       | 1058  | Direct estimate <sup>53</sup> |
| $K_{C,N}$ | sites/cell | No. of G-CSF receptors on neutrophil   | 600   | Direct estimate <sup>54</sup> |
| $K_{F,T}$ | sites/cell | No. of IFN receptors on T cells        | 1000  | Direct estimate <sup>55</sup> |
| $K_{F,I}$ | sites/cell | No. of IFN receptors on infected cells | 1300  | Direct estimate <sup>56</sup> |
| $MM_L$    | g/mol      | Molecular weight of IL-6               | 21000 | Direct estimate <sup>57</sup> |
| $MM_G$    | g/mol      | Molecular weight of GM-CSF             | 14000 | Direct estimate <sup>58</sup> |
| $MM_C$    | g/mol      | Molecular weight of G-CSF              | 19600 | Direct estimate <sup>14</sup> |
| $MM_F$    | g/mol      | Molecular weight of IFN- $\beta$       | 19000 | Direct estimate <sup>59</sup> |

*k) Initial conditions*

| Param          | Units           | Description                      | Value                 | Estimation and citation          |
|----------------|-----------------|----------------------------------|-----------------------|----------------------------------|
| $V_0$          | log(copies/ml)  | Initial viral load               | 4.5                   | Direct estimate <sup>1</sup>     |
| $S_0$          | $10^9$ cells/ml | Initial susceptible cells        | 0.16                  | Direct estimate <sup>3,60</sup>  |
| $I_0$          | $10^9$ cells/ml | Initial infected cells           | 0                     | Estimated                        |
| $R_0$          | $10^9$ cells/ml | Initial resistant cells          | 0                     | Estimated                        |
| $M_{\Phi R,0}$ | $10^9$ cells/ml | Initial resident macrophages     | $2.7 \times 10^{-5}$  | Direct estimate <sup>3</sup>     |
| $M_{\Phi I,0}$ | $10^9$ cells/ml | Initial inflammatory macrophages | $2.9 \times 10^{-7}$  | Homeostasis                      |
| $M_0$          | $10^9$ cells/ml | Initial monocytes                | 0.0004                | Direct estimate <sup>61</sup>    |
| $M_R$          | $10^9$ cells/ml | Initial reservoir monocytes      | 0.0023                | Direct estimate <sup>13</sup>    |
| $N_0$          | $10^9$ cells/ml | Initial neutrophils              | 0.0053                | Direct estimate <sup>14</sup>    |
| $N_R$          | $10^9$ cells/ml | Initial reservoir neutrophils    | 0.0316                | Direct estimate <sup>14</sup>    |
| $T_0$          | $10^9$ cells/ml | Initial CD8 <sup>+</sup> T cells | $1.1 \times 10^{-4}$  | Direct estimate <sup>62,63</sup> |
| $L_{U,0}$      | pg/ml           | Initial unbound IL-6             | 1.1                   | Direct estimate <sup>64</sup>    |
| $L_{B,0}$      | pg/ml           | Initial bound IL-6               | $1.4 \times 10^{-6}$  | Homeostasis                      |
| $G_{U,0}$      | pg/ml           | Initial unbound GM-CSF           | 2.43                  | Direct estimate <sup>65</sup>    |
| $G_{B,0}$      | pg/ml           | Initial bound GM-CSF             | $1.6 \times 10^{-8}$  | Homeostasis                      |
| $C_{U,0}$      | ng/ml           | Initial unbound G-CSF            | 0.025                 | Direct estimate <sup>14</sup>    |
| $C_{B,0}$      | ng/ml           | Initial bound G-CSF              | $6.5 \times 10^{-10}$ | Direct estimate <sup>14</sup>    |
| $F_{U,0}$      | pg/ml           | Initial unbound IFN              | 0.015                 | Direct estimate <sup>66</sup>    |
| $F_{B,0}$      | pg/ml           | Initial bound IFN                | $1.1 \times 10^{-8}$  | Homeostasis                      |

*m) List of variables in Eqs. S1-S22*

| <b>Variable</b> | <b>Units</b>    | <b>Description</b>                       |
|-----------------|-----------------|------------------------------------------|
| $V$             | cop/ml          | Viral load                               |
| $S$             | $10^9$ cells/ml | Susceptible cells                        |
| $I$             | $10^9$ cells/ml | Infected cells                           |
| $R$             | $10^9$ cells/ml | Resistant cells                          |
| $M_{\Phi R}$    | $10^9$ cells/ml | Alveolar (resident) macrophages          |
| $M_{\Phi I}$    | $10^9$ cells/ml | Inflammatory macrophages                 |
| $M$             | $10^9$ cells/ml | Monocytes                                |
| $M_R$           | $10^9$ cells/ml | Bone marrow reservoir monocytes          |
| $N$             | $10^9$ cells/ml | Neutrophils                              |
| $N_R$           | $10^9$ cells/ml | Bone marrow reservoir neutrophils        |
| $T$             | $10^9$ cells/ml | CD8 <sup>+</sup> T cells                 |
| $L_U$           | pg/ml           | Unbound IL-6                             |
| $L_B$           | pg/ml           | Bound IL-6                               |
| $G_U$           | pg/ml           | Unbound GM-CSF                           |
| $G_B$           | pg/ml           | Bound GM-CSF                             |
| $C_U$           | ng/ml           | Unbound G-CSF                            |
| $C_B$           | ng/ml           | Bound G-CSF                              |
| $C_{BF}$        | unitless        | Neutrophil G-CSF receptor bound fraction |
| $F_U$           | pg/ml           | Unbound IFN                              |
| $F_B$           | pg/ml           | Bound IFN                                |
